# Supplementary material for: Construction of zirconium/hafnium-oxo clusters based on a new protection-calix[8]arene
Source: Royal Society of Chemistry journal article supplement (doi:10.1039/d4dt00169a), 2024-01-01
Supplement: d4dt00169a1.pdf [file d4dt00169a1.pdf]

## Supporting Information

### **Construction of zirconium/hafnium–oxo clusters based on new protection–calix[8]arene**

Fei-Fei Wang <sup>a,\*</sup> and Baoshan Hou <sup>b,\*</sup>

*<sup>a</sup> Department of Chemistry, Xinzhou Normal University, Xinzhou 034000, China*

*<sup>b</sup> Key Laboratory of Precise Synthesis of Functional Molecules of Zhejiang Province, Department of Chemistry, School of Science and Research Center for Industries of the Future, Westlake University, and Westlake Institute for Advanced Study, 600 Dunyuan Road, Zhejiang, Hangzhou, 310030, China.*

\*Corresponding author

E-mail: wangff718@nenu.edu.cn (F.-F. Wang)

E-mail: houbaoshan@westlake.edu.cn (B. Hou)

## General Experimental Section

All the reagents were obtained from commercial sources and used without further purification. Powder X-ray diffraction (PXRD) patterns were recorded ranging from 5 to 50° at room temperature on a Siemens D5005 diffractometer with Cu K $\alpha$  ( $\lambda = 1.5418$  Å). The C, H and N elemental analysis were conducted on a Perkin–Elmer 2400CHN elemental analyzer. Thermogravimetric analysis (TGA) of the samples were performed using a Perkin–Elmer TG–7 analyzer heated from room temperature to 800 °C under nitrogen at the heating rate of 10 °C·min<sup>-1</sup>. IR spectrum was performed in the range 4000–400 cm<sup>-1</sup> using KBr pellets on an Alpha Centaur FT/IR spectrophotometer.

### Synthesis of Zr<sub>4</sub>

A mixture of TBC[8] (40 mg), ZrCl<sub>4</sub> (40 mg) was dissolved in DMF (6 mL) and CH<sub>3</sub>OH (6 mL). The mixture was transferred into a Parr Teflon–lined autoclave and kept at 130 °C for 72 h. After cooling down to room temperature, the colorless crystals were obtained and washed with CH<sub>3</sub>OH. The crystals were achieved in a 43% yield based on TBC[8]. Elemental analysis (%): calculated for [Zr<sub>4</sub>Cl<sub>2</sub>(H<sub>2</sub>TBC[8])<sub>2</sub>(HCOO)<sub>2</sub>(CH<sub>3</sub>OH)<sub>4</sub>]·2CH<sub>3</sub>OH·3DMF, C 65.8, H 7.2, N 1.2; found, C 64.5, H 7.3, N 1.1.

### Synthesis of Zr<sub>8</sub>

A mixture of TBC[8] (100 mg), ZrCl<sub>4</sub> (50 mg) was dissolved in DMF (5 mL), CH<sub>3</sub>OH (5 mL) and en (ethylenediamine, 1 mL). The mixture was transferred into a Parr Teflon–lined autoclave and kept at 130 °C for 72 h. After cooling down to room temperature, the colorless crystals were obtained and washed with CH<sub>3</sub>OH. The crystals were achieved in a 35% yield based on TBC[8]. Elemental analysis (%): calculated for [Zr<sub>8</sub>(TBC[8])<sub>2</sub>( $\mu_4$ -O)<sub>2</sub>( $\mu_3$ -O)<sub>4</sub>( $\mu_3$ -OH)<sub>2</sub>( $\mu_2$ -OH)<sub>2</sub>(H<sub>2</sub>O)<sub>2</sub>(DMF)<sub>4</sub>]·8CH<sub>3</sub>OH·7DMF, C 57.1, H 7.0, N 3.3; found, C 56.2, H 6.6, N 3.2.

### Synthesis of Hf<sub>4</sub>

A mixture of TBC[8] (40 mg), HfCl<sub>4</sub> (40 mg) was dissolved in DMF (6 mL) and CH<sub>3</sub>OH (6 mL). The mixture was transferred into a Parr Teflon-lined autoclave and kept at 130 °C for 72 h. After cooling down to room temperature, the colorless crystals were obtained and washed with CH<sub>3</sub>OH. The crystals were achieved in a 38% yield based on TBC[8]. Elemental analysis (%): calculated for [Hf<sub>4</sub>Cl<sub>2</sub>(H<sub>2</sub>TBC[8])<sub>2</sub>(HCOO)<sub>2</sub>(CH<sub>3</sub>OH)<sub>4</sub>]·2CH<sub>3</sub>OH·3DMF, C 60.4, H 6.6, N 1.1; found, C 60.0, H 6.6, N 1.1.

### Synthesis of Hf<sub>8</sub>

A mixture of TBC[8] (100 mg), HfCl<sub>4</sub> (50 mg) was dissolved in DMF (5 mL), CH<sub>3</sub>OH (5 mL) and en (1 mL). The mixture was transferred into a Parr Teflon-lined autoclave and kept at 130 °C for 72 h. After cooling down to room temperature, the colorless crystals were obtained and washed with CH<sub>3</sub>OH. The crystals were achieved in a 40% yield based on TBC[8]. Elemental analysis (%): calculated for [Hf<sub>8</sub>(TBC[8])<sub>2</sub>(C<sub>3</sub>H<sub>6</sub>NO<sub>2</sub>)<sub>2</sub>(μ<sub>4</sub>-O)<sub>2</sub>(μ<sub>3</sub>-O)<sub>2</sub>(μ<sub>3</sub>-OH)<sub>4</sub>(μ<sub>2</sub>-OH)<sub>2</sub>(H<sub>2</sub>O)<sub>4</sub>(CH<sub>3</sub>OH)<sub>2</sub>]·8CH<sub>3</sub>OH·7DMF, C 48.9, H 5.4, N 2.4; found, C 47.7, H 5.5, N 2.3.

### Crystal data collection and refinements

All data collections were performed on a Bruker D8-Venture diffractometer with a Turbo X-ray Source (Cu Kα radiation, λ = 1.5418 Å) adopting the direct drive rotating anode technique and a CMOS detector at 293 K. The data frames were collected using the program APEX 3 and processed using the program SAINT routine in APEX 3. The structures were solved by direct methods and refined by the full matrix least-squares on *F*<sup>2</sup> using the SHELXL-2014 program. The diffused electron densities resulting from these residual solvent molecules were removed from the data set using the SQUEEZE routine of PLATON and refined further using the data generated. The restrained DFIX, SIMU, ISOR instructions were used to make the structures more reasonable. The formula unit was obtained through a combination of elemental analyses and

thermogravimetric characterization. CCDC number of 2322411-2322414 for **Zr4**, for **Hf4**, for **Zr8**, for **Hf8**.

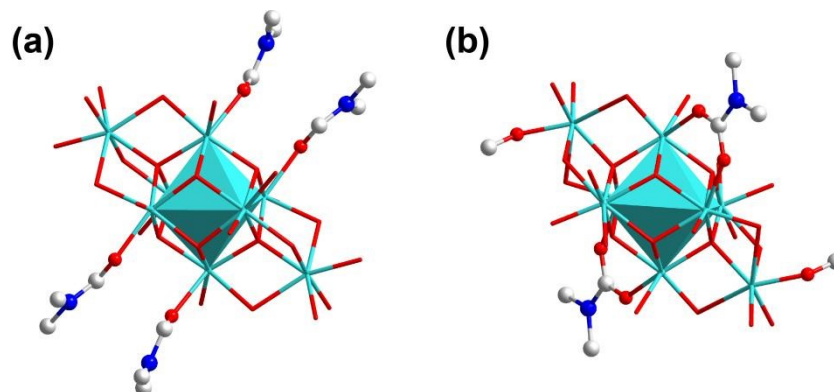

**Fig. S1** Representation of **Zr<sub>8</sub>** (a) and **Hf<sub>8</sub>** (b) metallic core.

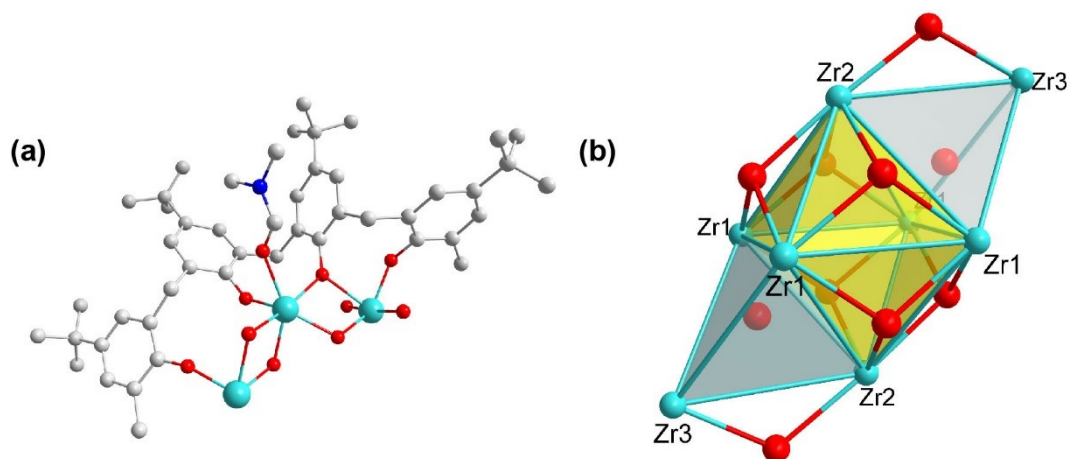

**Fig. S2** (a) Asymmetric unit of **Zr<sub>8</sub>**. (b) Representation of **Zr<sub>8</sub>** metal core.

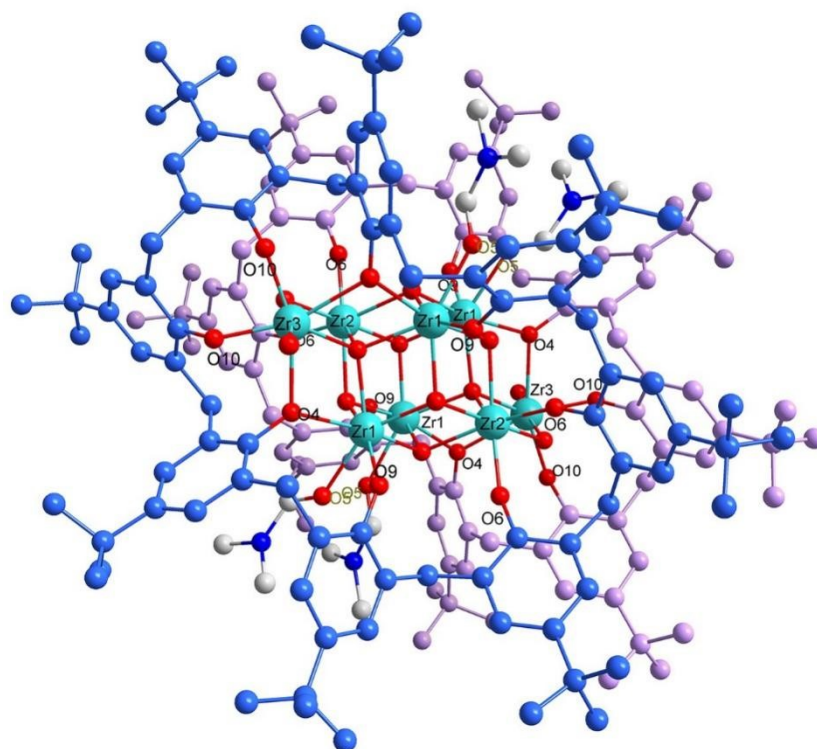

**Fig. S3** Crystal structure of **Zr<sub>8</sub>** with atomic labels.

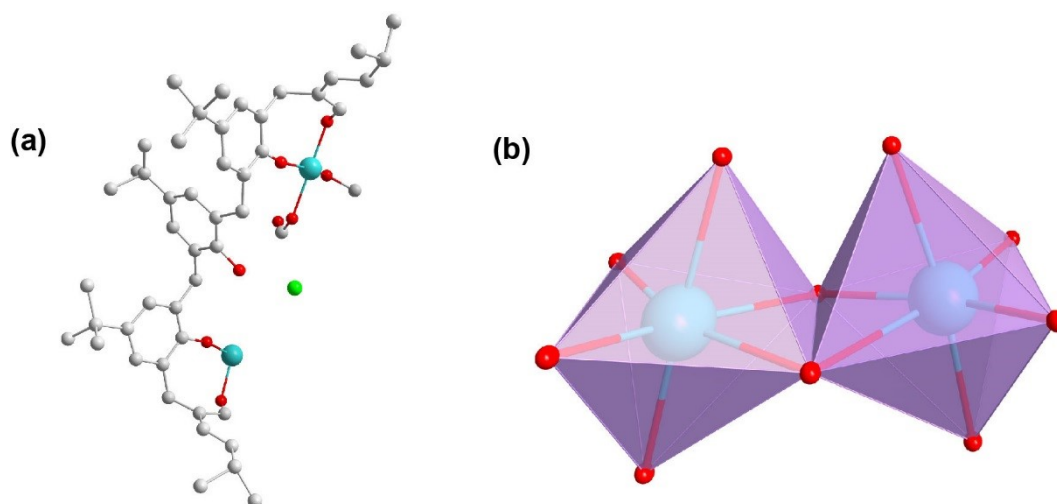

**Fig. S4** (a) Asymmetric unit of **Zr<sub>4</sub>**. (b) Coordination mode of Zr in **Zr<sub>4</sub>**. All Zr sites are in the six-coordinate environment.

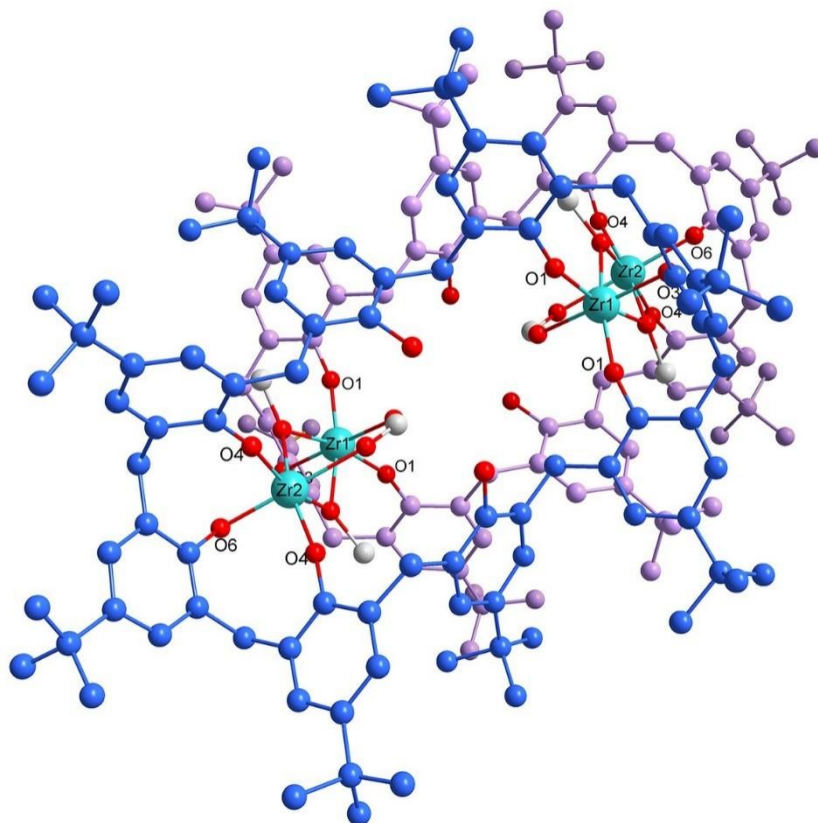

**Fig. S5** Crystal structure of **Zr<sub>4</sub>** with atomic labels.

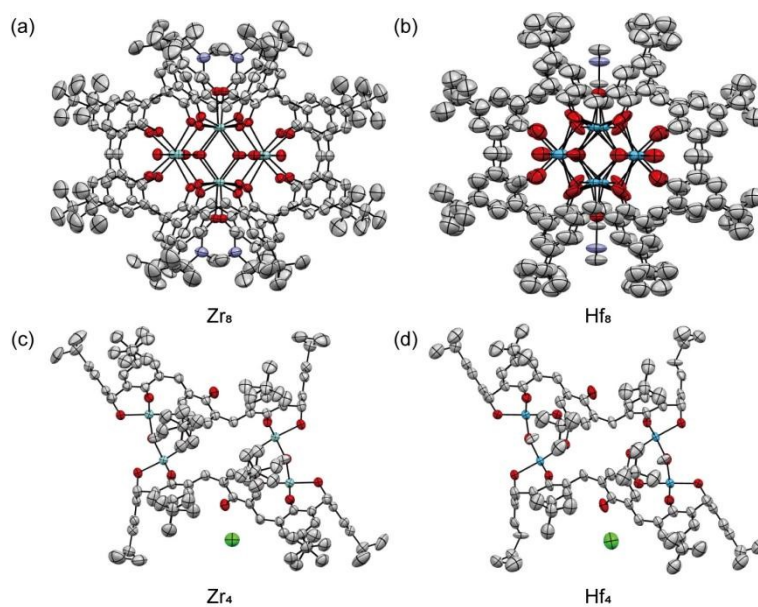

**Fig. S6** Thermal ellipsoid plot drawings of the crystal structures of **Zr<sub>8</sub>**, **Hf<sub>8</sub>**, **Zr<sub>4</sub>** and **Hf<sub>4</sub>**.

**Table S1.** The Crystallographic data for **Zr<sub>4</sub>** and **Zr<sub>8</sub>**

| Compound                            | <b>Zr<sub>4</sub></b>                                                                            | <b>Zr<sub>8</sub></b>                                                             |
|-------------------------------------|--------------------------------------------------------------------------------------------------|-----------------------------------------------------------------------------------|
| Empirical formula                   | Zr <sub>4</sub> Cl <sub>2</sub> O <sub>29</sub> C <sub>193</sub> N <sub>3</sub> H <sub>255</sub> | Zr <sub>8</sub> O <sub>47</sub> N <sub>11</sub> C <sub>217</sub> H <sub>317</sub> |
| Formula weight                      | 3516.89                                                                                          | 4561.67                                                                           |
| Crystal system                      | Monoclinic                                                                                       | Monoclinic                                                                        |
| Space group                         | C2/m                                                                                             | C2/m                                                                              |
| Temperature (K)                     | 296.61                                                                                           | 296.31                                                                            |
| Wavelength (Å)                      | 1.54178                                                                                          | 1.54178                                                                           |
| a (Å)                               | 26.4909(13)                                                                                      | 20.8087(15)                                                                       |
| b (Å)                               | 22.8712(12)                                                                                      | 30.081(2)                                                                         |
| c (Å)                               | 19.5689(9)                                                                                       | 18.0516(14)                                                                       |
| α (°)                               | 90                                                                                               | 90                                                                                |
| β (°)                               | 122.050(3)                                                                                       | 106.317(4)                                                                        |
| γ (°)                               | 90                                                                                               | 90                                                                                |
| Volume (Å <sup>3</sup> )            | 10049.3(9)                                                                                       | 10844.3(14)                                                                       |
| Z                                   | 2                                                                                                | 2                                                                                 |
| Dcalc. /mg·m <sup>-3</sup>          | 1.162                                                                                            | 1.397                                                                             |
| μ/mm <sup>-1</sup>                  | 2.338                                                                                            | 3.502                                                                             |
| F(000)                              | 3408.0                                                                                           | 3936.0                                                                            |
| Limiting indices                    | -31<=h<=31,<br>-27<=k<=27,<br>-23<=l<=23                                                         | -24<=h<=24,<br>-35<=k<=35,<br>-19<=l<=21                                          |
| Theta range for data collection (°) | 5.328 to 133.696                                                                                 | 8.184 to 134.368                                                                  |
| Reflections collected               | 35632                                                                                            | 46213                                                                             |
| Independent reflections             | 8967 [R(int) = 0.0745]                                                                           | 9798 [R(int) = 0.0595]                                                            |
| Refinement method                   | Full-matrix least-squares on F2                                                                  | Full-matrix least-squares on F2                                                   |
| Data /restraints /                  | 8967/601/603                                                                                     | 9798/1110/549                                                                     |

|                                 |                                                      |                                                      |
|---------------------------------|------------------------------------------------------|------------------------------------------------------|
| parameters                      |                                                      |                                                      |
| Goodness-of-fit on F2           | 1.039                                                | 1.052                                                |
| Final R indices [I > 2sigma(I)] | R <sub>1</sub> = 0.0928,<br>wR <sub>2</sub> = 0.2035 | R <sub>1</sub> = 0.0766,<br>wR <sub>2</sub> = 0.1883 |
| R indices (all data)            | R <sub>1</sub> = 0.1418,<br>wR <sub>2</sub> = 0.2447 | R <sub>1</sub> = 0.1025,<br>wR <sub>2</sub> = 0.2161 |

**Table S2.** The Crystallographic data for **Hf<sub>4</sub>** and **Hf<sub>8</sub>**

| Compound                               | <b>Hf<sub>4</sub></b>                                                                            | <b>Hf<sub>8</sub></b>                                                            |
|----------------------------------------|--------------------------------------------------------------------------------------------------|----------------------------------------------------------------------------------|
| Empirical formula                      | Hf <sub>4</sub> Cl <sub>2</sub> O <sub>29</sub> C <sub>193</sub> N <sub>3</sub> H <sub>255</sub> | Hf <sub>8</sub> O <sub>50</sub> N <sub>9</sub> C <sub>213</sub> H <sub>307</sub> |
| Formula weight                         | 3861.92                                                                                          | 5221.66                                                                          |
| Crystal system                         | Monoclinic                                                                                       | Monoclinic                                                                       |
| Space group                            | C2/m                                                                                             | C2/m                                                                             |
| Temperature (K)                        | 290.56                                                                                           | 290.56                                                                           |
| Wavelength (Å)                         | 0.71073                                                                                          | 1.54178                                                                          |
| a (Å)                                  | 26.560(8)                                                                                        | 21.070(4)                                                                        |
| b (Å)                                  | 22.889(6)                                                                                        | 30.684(5)                                                                        |
| c (Å)                                  | 19.280(6)                                                                                        | 17.217(6)                                                                        |
| α (°)                                  | 90                                                                                               | 90                                                                               |
| β (°)                                  | 120.746(10)                                                                                      | 106.524(7)                                                                       |
| γ (°)                                  | 90                                                                                               | 90                                                                               |
| Volume (Å <sup>3</sup> )               | 10074(5)                                                                                         | 10672(5)                                                                         |
| Z                                      | 2                                                                                                | 2                                                                                |
| D <sub>calc.</sub> /mg·m <sup>-3</sup> | 1.273                                                                                            | 1.625                                                                            |
| μ/mm <sup>-1</sup>                     | 2.122                                                                                            | 7.415                                                                            |
| F(000)                                 | 3630.0                                                                                           | 4400.0                                                                           |
| Limiting indices                       | -31 ≤ h ≤ 28,<br>-26 ≤ k ≤ 27,<br>-22 ≤ l ≤ 22                                                   | -24 ≤ h ≤ 24,<br>-35 ≤ k ≤ 35,<br>-20 ≤ l ≤ 19                                   |



|                                     |                                                      |                                                      |
|-------------------------------------|------------------------------------------------------|------------------------------------------------------|
| Theta range for data collection (°) | 4.94 to 50.222                                       | 5.354 to 128.872                                     |
| Reflections collected               | 26987                                                | 55861                                                |
| Independent reflections             | 9071 [R(int) = 0.0574]                               | 8967 [R(int) = 0.0492]                               |
| Refinement method                   | Full-matrix least-squares on F2                      | Full-matrix least-squares on F2                      |
| Data / restraints / parameters      | 9071/1066/ 516                                       | 8967/1229/526                                        |
| Goodness-of-fit on F2               | 1.087                                                | 1.083                                                |
| Final R indices [I > 2sigma(I)]     | R <sub>1</sub> = 0.0854,<br>wR <sub>2</sub> = 0.2197 | R <sub>1</sub> = 0.1020,<br>wR <sub>2</sub> = 0.2682 |
| R indices (all data)                | R <sub>1</sub> = 0.1370,<br>wR <sub>2</sub> = 0.2798 | R <sub>1</sub> = 0.1271,<br>wR <sub>2</sub> = 0.2960 |

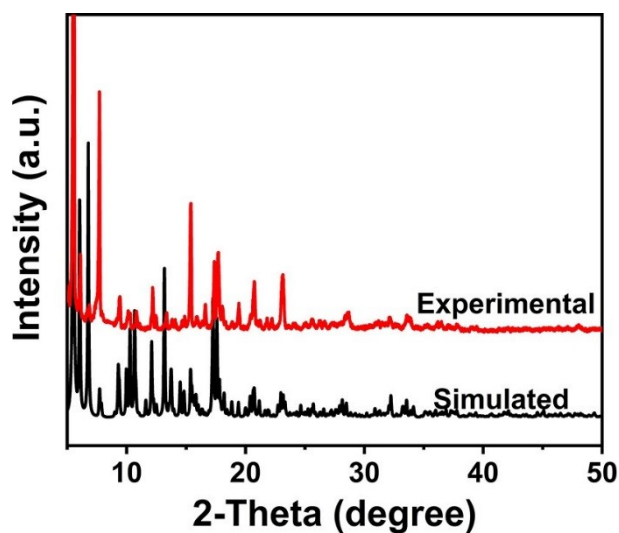

**Fig. S7** Simulated and experimental PXRD pattern of **Zr<sub>4</sub>**.

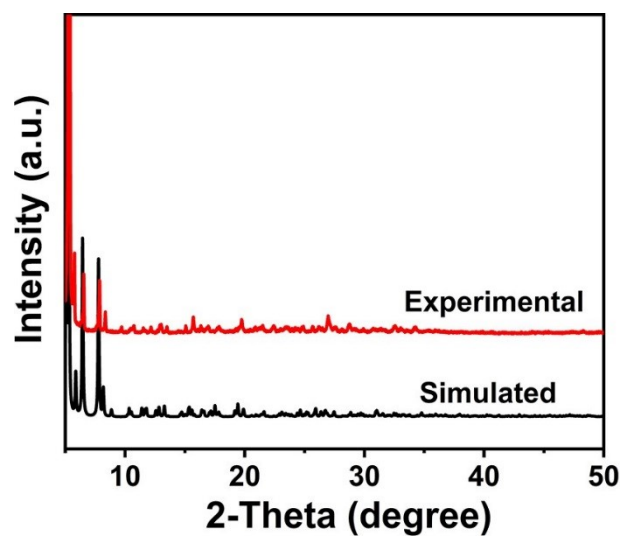

**Fig. S8** Simulated and experimental PXRD pattern of  $Zr_8$ .

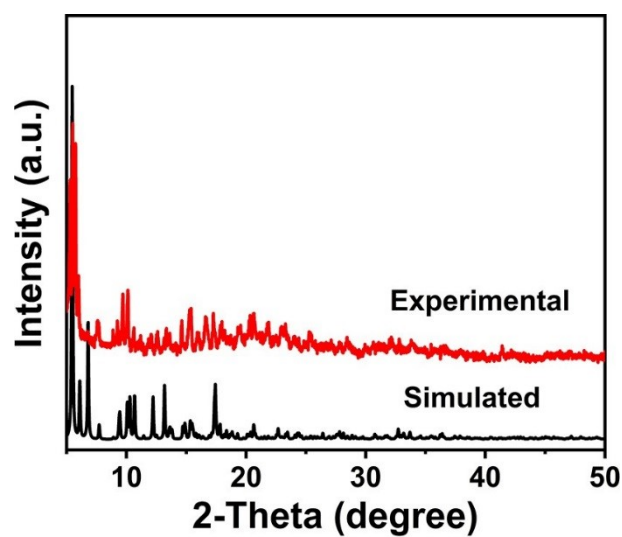

**Fig. S9** Simulated and experimental PXRD pattern of  $Hf_4$ .

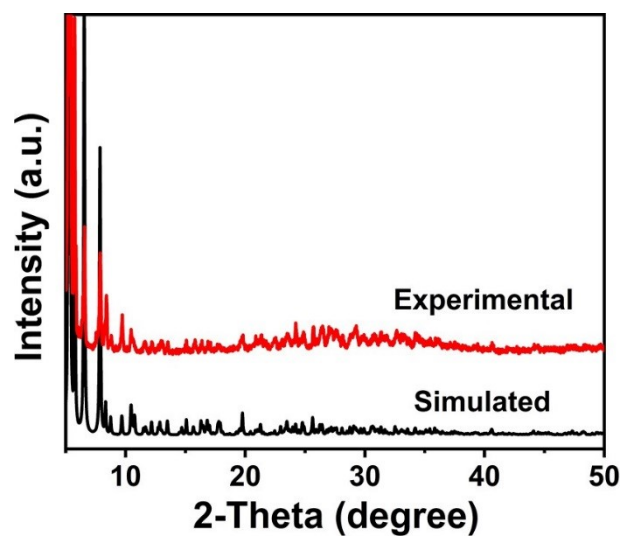

**Fig. S10** Simulated and experimental PXRD pattern of  $\text{Hf}_8$ .

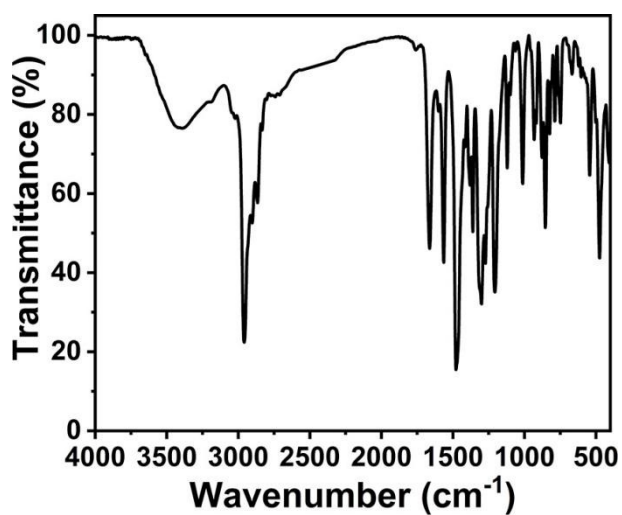

**Fig. S11** IR curve of  $\text{Zr}_4$ .

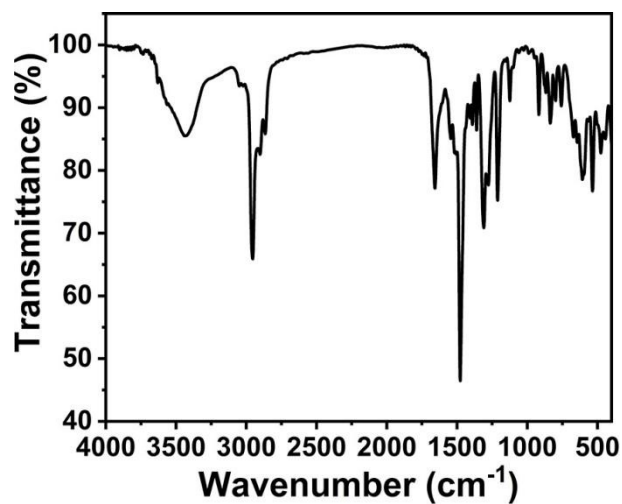

Fig. S12 IR curve of  $Zr_8$ .

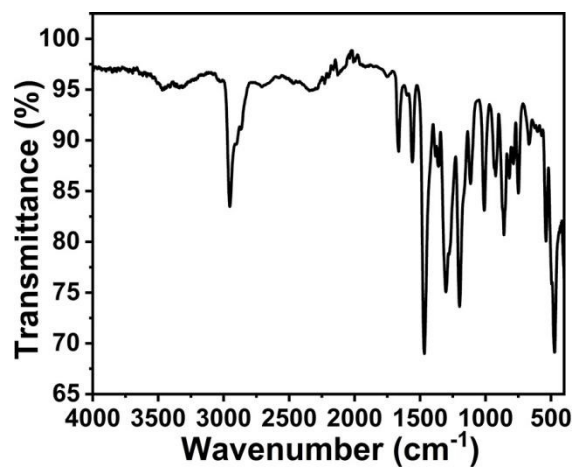

Fig. S13 IR curve of  $Hf_4$ .

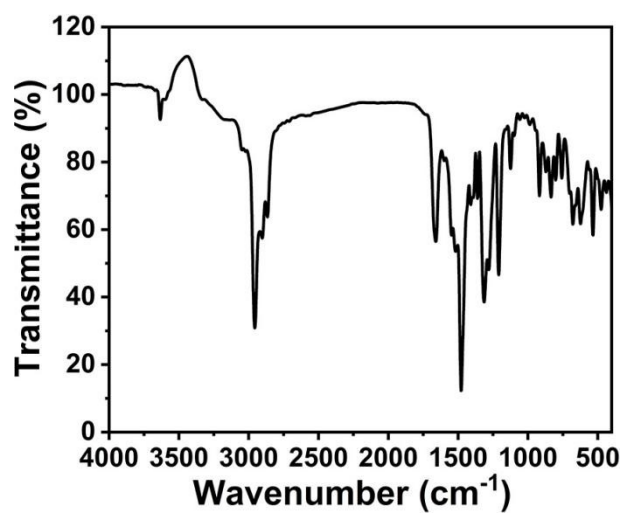

Fig. S14 IR curve of  $Hf_8$ .

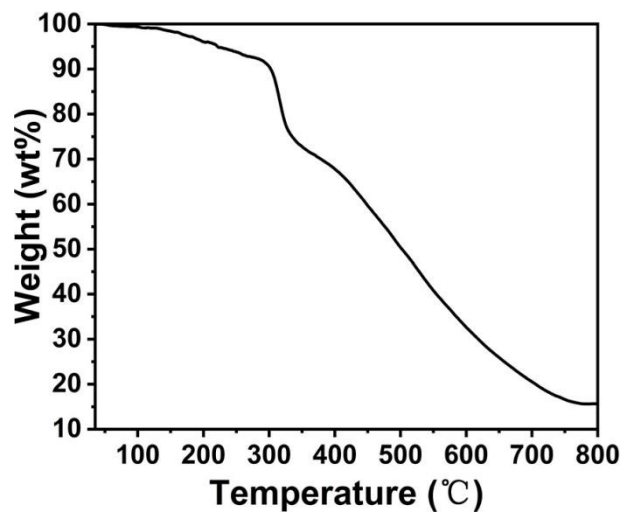

Fig. S15 TG curve of Zr<sub>4</sub>.

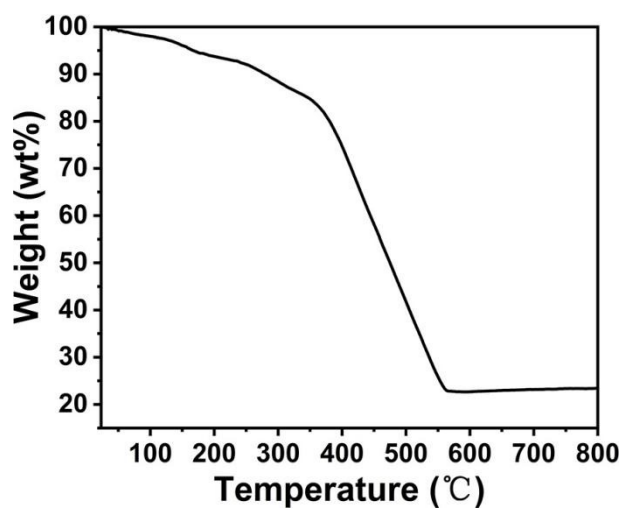

Fig. S16 TG curve of Zr<sub>8</sub>.

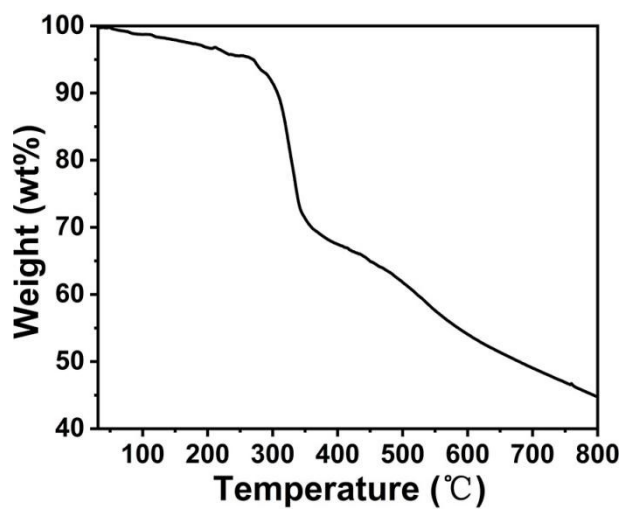

Fig. S17 TG curve of  $\text{Hf}_4$ .

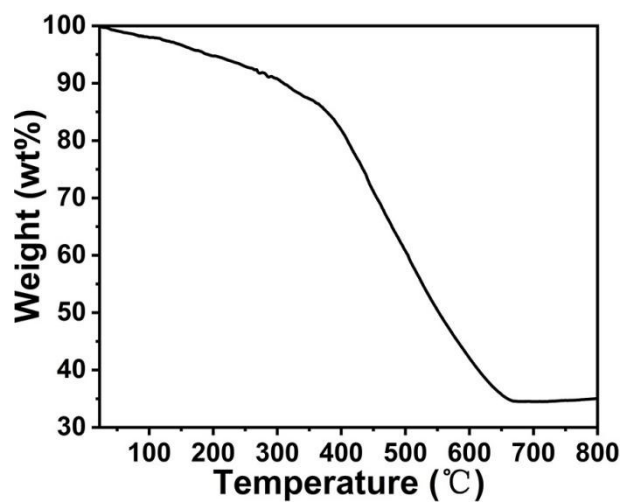

Fig. S18 TG curve of  $\text{Hf}_8$ .

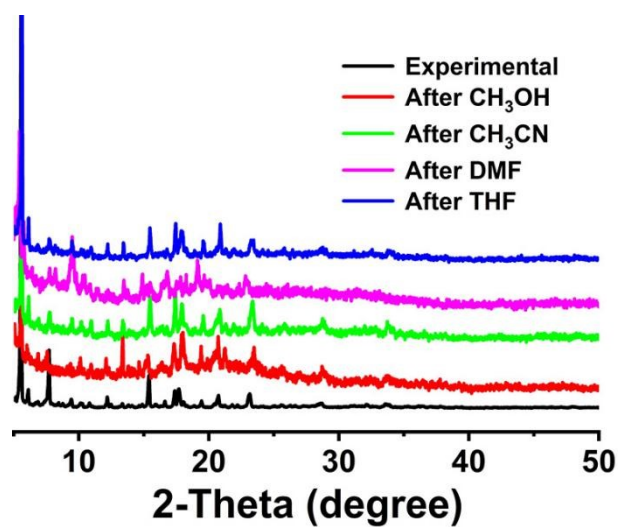

Fig. S19 Stability tests of  $\text{Zr}_4$  in different solvent.

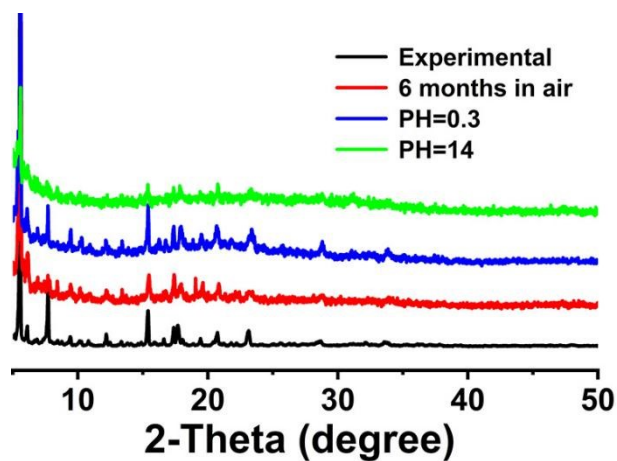

Fig. S20 Stability tests of  $Zr_4$  in air and aqueous solutions with different pH values.

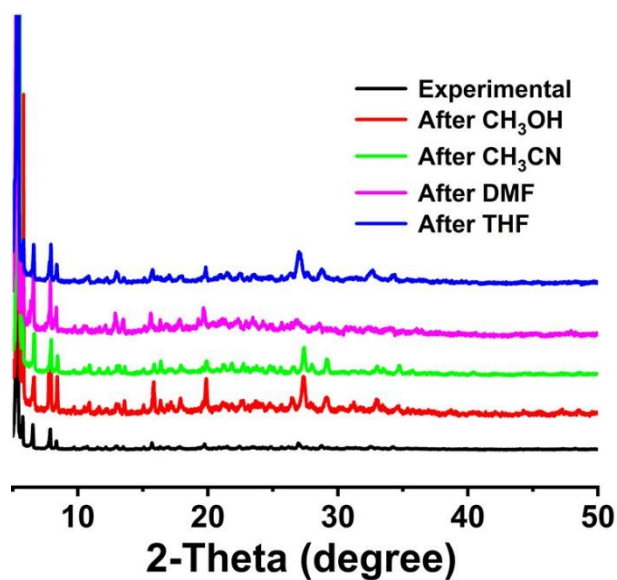

Fig. S21 Stability tests of  $Zr_8$  in different solvent.

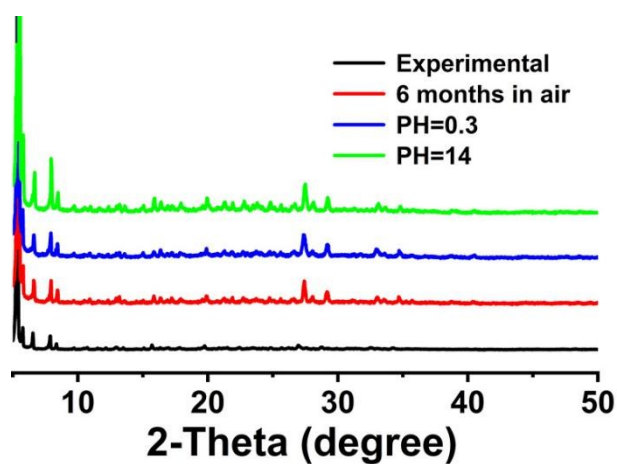

Fig. S22 Stability tests of  $Zr_8$  in air and aqueous solutions with different pH values.

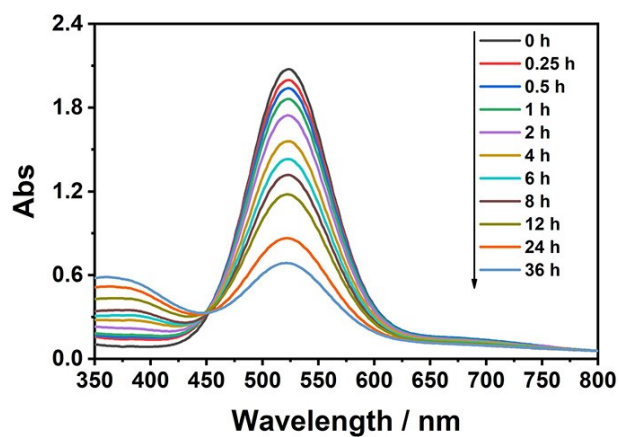

**Fig. S23** Temporal evolution of UV-vis absorption spectra of  $\text{Hf}_4$  captured by  $\text{I}_2$  in an iodine/cyclohexane solution ( $2 \times 10^{-3} \text{ mol L}^{-1}$ ).

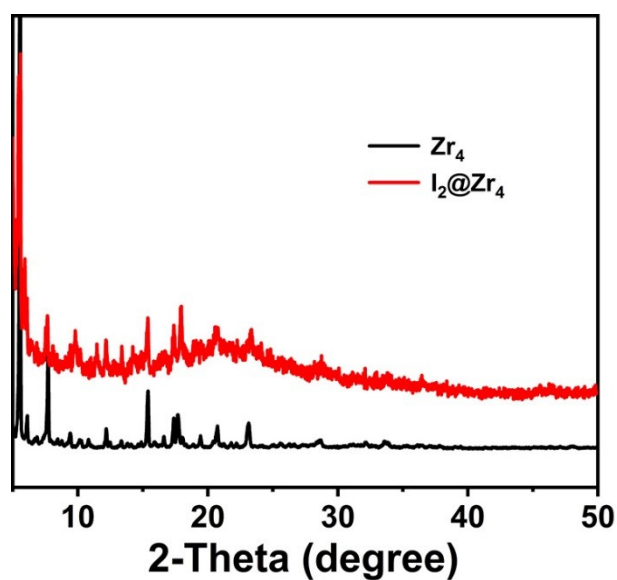

**Fig. S24** PXRD pattern of  $\text{Zr}_4$  and  $\text{I}_2@Zr_4$ .



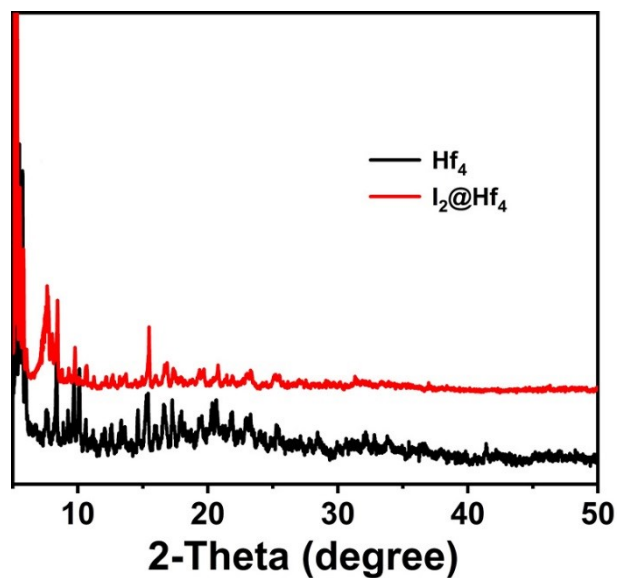

Fig. S25 PXR D pattern of  $\text{Hf}_4$  and  $\text{I}_2@ \text{Hf}_4$ .

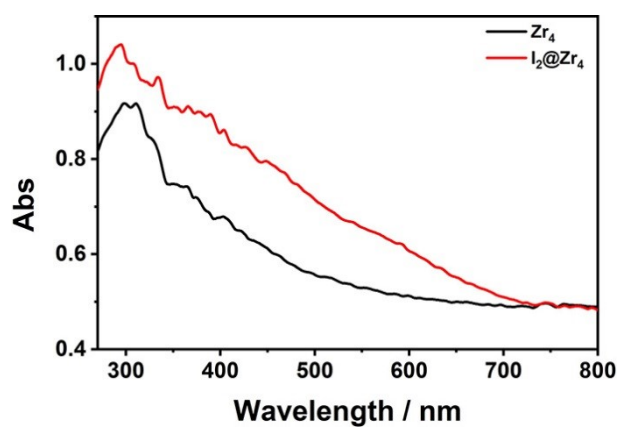

Fig. S26 Solid UV/visible absorption spectra of  $\text{Zr}_4$  and  $\text{I}_2@ \text{Zr}_4$ .

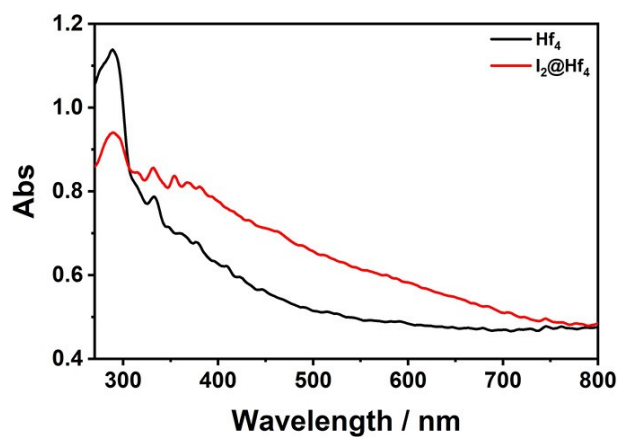

Fig. S27 Solid UV/visible absorption spectra of  $\text{Hf}_4$  and  $\text{I}_2@ \text{Hf}_4$ .

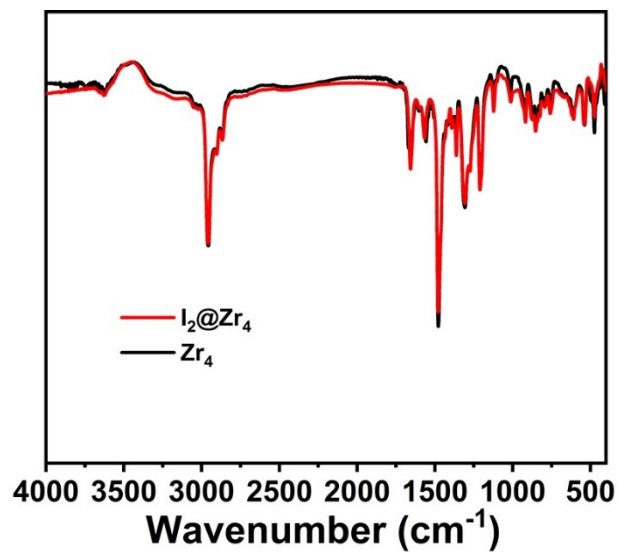

Fig. S28 FT-IR spectra of  $Zr_4$  and  $I_2@Zr_4$ .

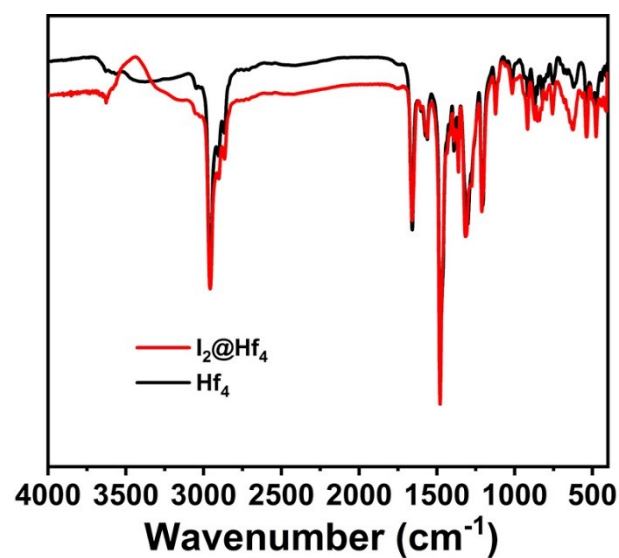

Fig. S29 FT-IR spectra of  $Hf_4$  and  $I_2@Hf_4$ .

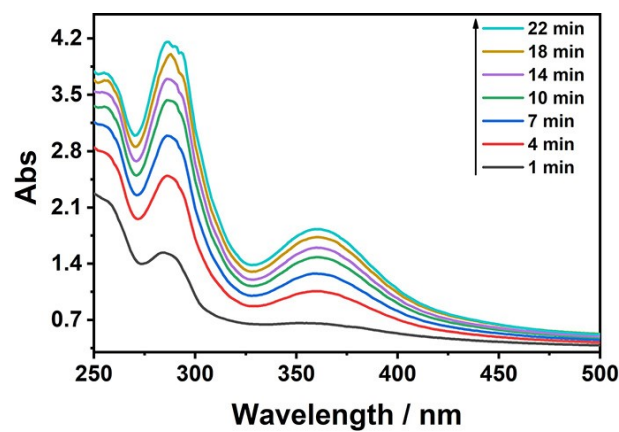

**Fig. S30** UV-Vis absorption spectra of iodine released from  $\mathbf{I}_2@Hf_4$  with 3 ml of acetonitrile.

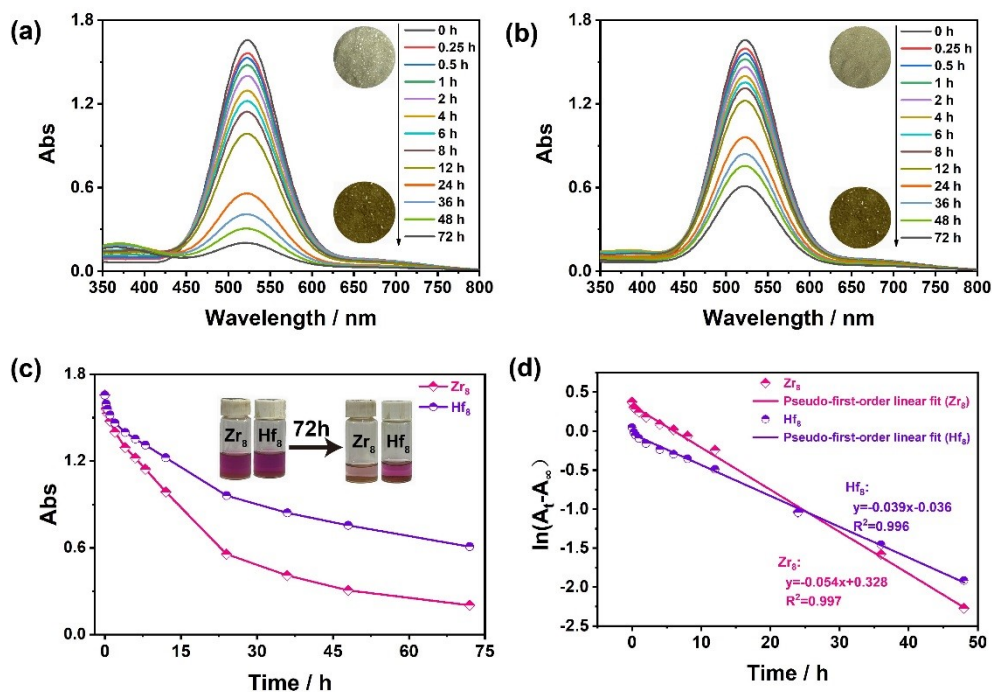

**Fig. S31** Temporal evolution of UV-Vis absorption spectra of (a)  $Zr_8$  and (b)  $Hf_8$  captured by  $I_2$  in an iodine/cyclohexane solution ( $2 \times 10^{-3} \text{ mol L}^{-1}$ ). (c) Plots of time vs absorbance for  $Zr_8$  and  $Hf_8$  monitored at 523 nm of iodine at selected time intervals. (d) Kinetic analysis of  $Zr_8$  and  $Hf_8$  monitored at 523 nm of iodine adsorption at different time intervals.

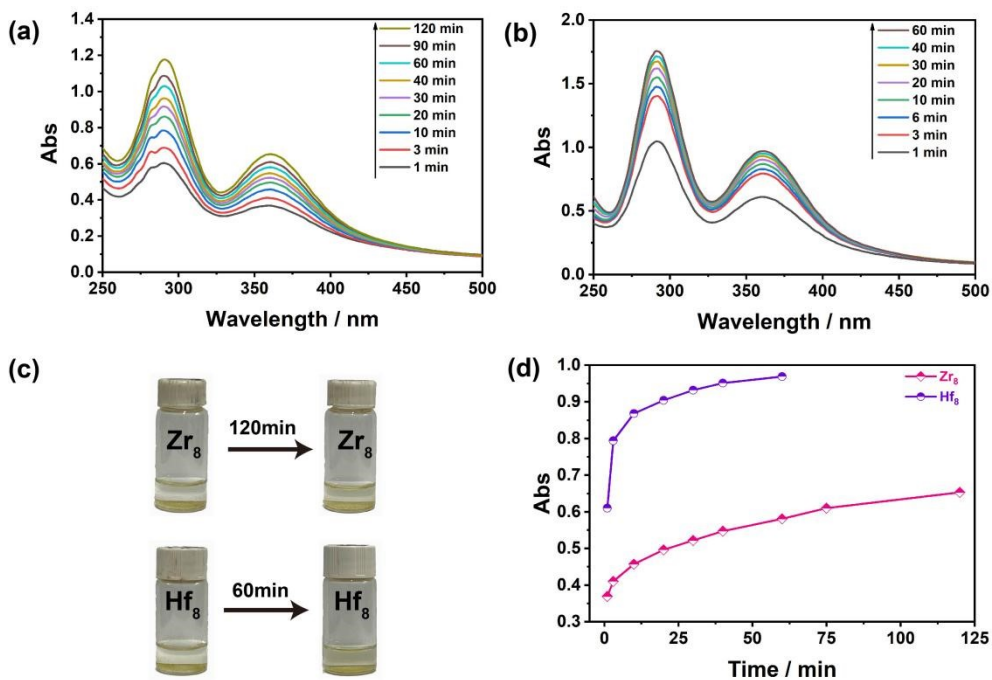

**Fig. S32** UV-Vis absorption spectra of iodine released from (a)  $I_2@Zr_8$  and (b)  $I_2@Hf_8$  with 3 ml of acetonitrile. (c) Photographs of the color change of acetonitrile solutions of samples  $I_2@Zr_8$  and  $I_2@Hf_8$  after iodine release. (d) Plots of time vs absorbance for  $I_2@Zr_8$  and  $I_2@Hf_8$  monitored at different time intervals, respectively.

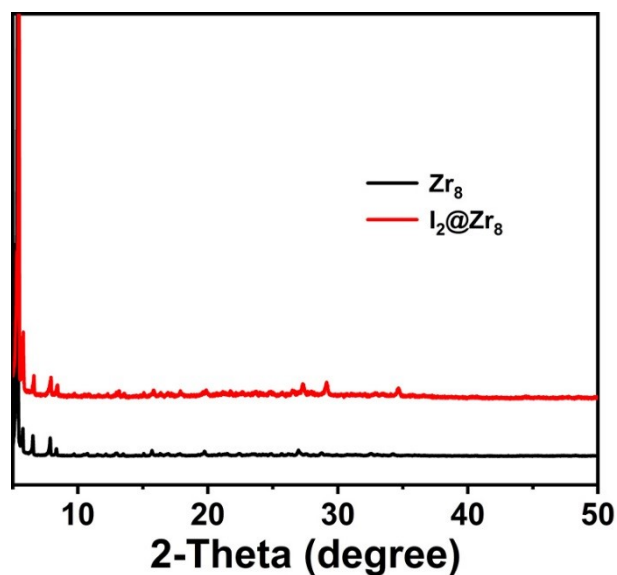

**Fig. S33** PXRD pattern of  $Zr_8$  and  $I_2@Zr_8$ .

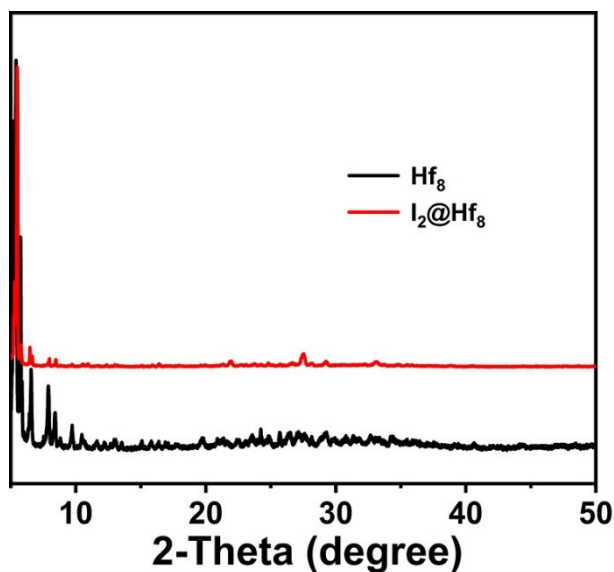

Fig. S34 PXR D pattern of  $\text{Hf}_8$  and  $\text{I}_2@ \text{Hf}_8$ .

Table 3. Cartesian coordinates of  $\text{Zr}_4$  model complex used in DFT calculation

| Symbol | x/a     | y/b     | z/c     | Symbol | x/a     | y/b     | z/c     |
|--------|---------|---------|---------|--------|---------|---------|---------|
| Zr1    | 0.54977 | 0.50563 | 0.71651 | O136   | 0.68977 | 0.50581 | 0.66029 |
| Zr2    | 0.6763  | 0.50497 | 0.75141 | O137   | 0.66276 | 0.50457 | 0.84237 |
| O3     | 0.48823 | 0.44333 | 0.69044 | C138   | 0.47612 | 0.62643 | 0.69619 |
| O4     | 0.48879 | 0.56857 | 0.69066 | C139   | 0.62323 | 0.60378 | 0.69378 |
| O5     | 0.61137 | 0.56916 | 0.74185 | C140   | 0.6243  | 0.40187 | 0.69798 |
| O6     | 0.61077 | 0.44141 | 0.74158 | Zr141  | 0.6219  | 0.50564 | 0.39612 |
| O7     | 0.51438 | 0.50565 | 0.8013  | O142   | 0.68376 | 0.44125 | 0.41819 |
| H8     | 0.44056 | 0.19439 | 0.62221 | O143   | 0.68273 | 0.57136 | 0.41697 |
| Zr9    | 0.49063 | 0.50432 | 0.36534 | O144   | 0.65221 | 0.50504 | 0.30929 |
| Zr10   | 0.62192 | 0.5056  | 0.39609 | C145   | 0.54992 | 0.40425 | 0.42076 |
| O11    | 0.55969 | 0.44202 | 0.37459 | C146   | 0.39137 | 0.61894 | 0.33639 |
| O12    | 0.55868 | 0.56786 | 0.37361 | C147   | 0.45285 | 0.61316 | 0.79963 |
| O13    | 0.42652 | 0.57455 | 0.35574 | C148   | 0.42418 | 0.6121  | 0.23122 |
| O14    | 0.42262 | 0.4372  | 0.35961 | H149   | 0.33592 | 0.59645 | 0.15821 |
| O15    | 0.4888  | 0.49849 | 0.45758 | H150   | 0.33822 | 0.59717 | 0.80311 |
| O16    | 0.4778  | 0.50081 | 0.26947 | H151   | 0.23957 | 0.56207 | 0.17428 |
| C17    | 0.47653 | 0.38526 | 0.69534 | H152   | 0.27453 | 0.59059 | 0.11507 |
| C18    | 0.54838 | 0.60615 | 0.41919 | H153   | 0.20918 | 0.55581 | 0.10657 |

---

|     |         |         |         |      |         |         |         |
|-----|---------|---------|---------|------|---------|---------|---------|
| C19 | 0.4541  | 0.50521 | 0.79715 | H154 | 0.24357 | 0.6181  | 0.83837 |
| C20 | 0.38904 | 0.39211 | 0.33886 | H155 | 0.19334 | 0.55141 | 0.86975 |
| C21 | 0.53317 | 0.50684 | 0.49773 | H156 | 0.2775  | 0.56261 | 0.89094 |
| C22 | 0.43033 | 0.5048  | 0.22685 | H157 | 0.22516 | 0.50502 | 0.73327 |
| O23 | 0.59196 | 0.5064  | 0.48316 | H158 | 0.18224 | 0.56771 | 0.76814 |
| O24 | 0.40364 | 0.43038 | 0.53925 | H159 | 0.2673  | 0.58088 | 0.74471 |
| H25 | 0.37928 | 0.45097 | 0.50835 | C160 | 0.64463 | 0.49202 | 0.62182 |
| C26 | 0.42762 | 0.38018 | 0.51567 | C161 | 0.45141 | 0.64777 | 0.74817 |
| C27 | 0.45211 | 0.36322 | 0.74712 | C162 | 0.4783  | 0.66054 | 0.64542 |
| C28 | 0.4787  | 0.35181 | 0.64417 | H163 | 0.6291  | 0.57711 | 0.65726 |
| C29 | 0.47677 | 0.35385 | 0.54211 | H164 | 0.66107 | 0.62821 | 0.70075 |
| C30 | 0.40348 | 0.35545 | 0.46456 | H165 | 0.58806 | 0.63189 | 0.68646 |
| C31 | 0.42359 | 0.45114 | 0.79681 | H166 | 0.63308 | 0.42371 | 0.65904 |
| C32 | 0.45413 | 0.39716 | 0.79898 | H167 | 0.66095 | 0.37773 | 0.71039 |
| C33 | 0.36217 | 0.45108 | 0.80094 | H168 | 0.58894 | 0.37374 | 0.69176 |
| C34 | 0.42289 | 0.55884 | 0.79695 | H169 | 0.5387  | 0.42811 | 0.45796 |
| C35 | 0.50153 | 0.37775 | 0.59306 | H170 | 0.51595 | 0.37567 | 0.41029 |
| C36 | 0.50401 | 0.30574 | 0.51528 | H171 | 0.58788 | 0.38035 | 0.42898 |
| C37 | 0.3874  | 0.37699 | 0.27902 | C172 | 0.38797 | 0.63356 | 0.27664 |
| C38 | 0.34863 | 0.3319  | 0.27573 | C173 | 0.35432 | 0.6491  | 0.37818 |
| C39 | 0.42474 | 0.39807 | 0.2343  | H174 | 0.43453 | 0.63768 | 0.83343 |
| C40 | 0.35187 | 0.36113 | 0.37985 | H175 | 0.49645 | 0.60478 | 0.81005 |
| C41 | 0.43116 | 0.30765 | 0.43753 | H176 | 0.42552 | 0.64262 | 0.19736 |
| C42 | 0.35323 | 0.37974 | 0.43862 | H177 | 0.46627 | 0.6061  | 0.2477  |
| H43 | 0.54665 | 0.37124 | 0.59203 | H178 | 0.65541 | 0.47194 | 0.58232 |
| H44 | 0.49308 | 0.42256 | 0.59418 | C179 | 0.4255  | 0.70384 | 0.748   |
| C45 | 0.3124  | 0.3141  | 0.3639  | C180 | 0.50136 | 0.63523 | 0.59408 |
| H46 | 0.43638 | 0.37222 | 0.83278 | C181 | 0.45186 | 0.71595 | 0.64481 |
| H47 | 0.4978  | 0.40581 | 0.80888 | C182 | 0.34861 | 0.67803 | 0.27411 |
| C48 | 0.404   | 0.45125 | 0.21051 | C183 | 0.35618 | 0.62983 | 0.43673 |
| C49 | 0.40363 | 0.55799 | 0.20942 | C184 | 0.31381 | 0.69553 | 0.36318 |
| H50 | 0.41438 | 0.29051 | 0.39874 | H185 | 0.40678 | 0.72052 | 0.78609 |
| C51 | 0.48123 | 0.28272 | 0.46309 | C186 | 0.42407 | 0.7369  | 0.69567 |
| C52 | 0.42536 | 0.30758 | 0.7461  | C187 | 0.47713 | 0.65849 | 0.54254 |
| H53 | 0.33952 | 0.41153 | 0.80262 | H188 | 0.54644 | 0.64206 | 0.59344 |

---

---

|     |         |         |         |      |         |         |         |
|-----|---------|---------|---------|------|---------|---------|---------|
| C54 | 0.33141 | 0.50429 | 0.80491 | H189 | 0.4934  | 0.59033 | 0.59511 |
| C55 | 0.50873 | 0.23469 | 0.4365  | H190 | 0.45176 | 0.74093 | 0.60665 |
| C56 | 0.45168 | 0.29671 | 0.64274 | C191 | 0.31069 | 0.71269 | 0.30421 |
| C57 | 0.35527 | 0.45069 | 0.17288 | C192 | 0.40568 | 0.6549  | 0.46332 |
| H58 | 0.54119 | 0.28719 | 0.53405 | H193 | 0.35995 | 0.58442 | 0.43793 |
| C59 | 0.33049 | 0.50363 | 0.15376 | H194 | 0.31833 | 0.6428  | 0.4586  |
| C60 | 0.35491 | 0.55722 | 0.17166 | C195 | 0.39573 | 0.79148 | 0.6939  |
| C61 | 0.27792 | 0.50291 | 0.12171 | C196 | 0.4285  | 0.63159 | 0.51569 |
| H62 | 0.35566 | 0.42524 | 0.44049 | C197 | 0.5049  | 0.70602 | 0.51521 |
| H63 | 0.31583 | 0.36529 | 0.46032 | C198 | 0.27552 | 0.75789 | 0.28193 |
| H64 | 0.52181 | 0.51244 | 0.54155 | C199 | 0.43395 | 0.70207 | 0.43581 |
| C65 | 0.31046 | 0.29669 | 0.30494 | C200 | 0.33474 | 0.78296 | 0.69415 |
| H66 | 0.42767 | 0.36687 | 0.20117 | C201 | 0.41241 | 0.82554 | 0.74238 |
| H67 | 0.46623 | 0.40514 | 0.25187 | C202 | 0.41194 | 0.81988 | 0.64169 |
| H68 | 0.2864  | 0.29363 | 0.39527 | O203 | 0.40406 | 0.58194 | 0.53997 |
| H69 | 0.3365  | 0.41102 | 0.16051 | C204 | 0.48352 | 0.72749 | 0.46176 |
| H70 | 0.53735 | 0.58264 | 0.45666 | H205 | 0.54159 | 0.7251  | 0.53441 |
| H71 | 0.51407 | 0.63412 | 0.4082  | C206 | 0.2353  | 0.78409 | 0.33573 |
| H72 | 0.58603 | 0.63065 | 0.42712 | C207 | 0.31732 | 0.81066 | 0.25633 |
| C73 | 0.2764  | 0.25089 | 0.28202 | C208 | 0.2385  | 0.73677 | 0.23761 |
| H74 | 0.4512  | 0.27236 | 0.60418 | H209 | 0.41809 | 0.71824 | 0.39624 |
| C75 | 0.42344 | 0.27545 | 0.69323 | H210 | 0.32264 | 0.76142 | 0.73248 |
| H76 | 0.40623 | 0.29064 | 0.78387 | H211 | 0.31375 | 0.82339 | 0.69208 |
| C77 | 0.39206 | 0.22266 | 0.68989 | H212 | 0.32278 | 0.75774 | 0.65809 |
| C78 | 0.36144 | 0.55798 | 0.80119 | H213 | 0.45758 | 0.83171 | 0.74172 |
| C79 | 0.27097 | 0.50378 | 0.81652 | H214 | 0.39146 | 0.86599 | 0.7404  |
| C80 | 0.24392 | 0.22653 | 0.32835 | H215 | 0.40053 | 0.80402 | 0.78079 |
| C81 | 0.31958 | 0.20035 | 0.25411 | H216 | 0.3911  | 0.86035 | 0.63914 |
| C82 | 0.23785 | 0.27232 | 0.23906 | H217 | 0.45713 | 0.82588 | 0.64119 |
| C83 | 0.24836 | 0.55632 | 0.12991 | H218 | 0.3811  | 0.56008 | 0.50887 |
| C84 | 0.24276 | 0.4567  | 0.14231 | C219 | 0.51163 | 0.77469 | 0.43434 |
| C85 | 0.28973 | 0.49456 | 0.06186 | H220 | 0.28356 | 0.79754 | 0.36209 |
| C86 | 0.56841 | 0.24753 | 0.42848 | H221 | 0.204   | 0.80356 | 0.37955 |
| C87 | 0.48192 | 0.22351 | 0.38223 | H222 | 0.35077 | 0.85244 | 0.23603 |
| C88 | 0.50274 | 0.18591 | 0.47359 | H223 | 0.27022 | 0.83934 | 0.24373 |

---

---

|      |         |         |         |      |         |         |         |
|------|---------|---------|---------|------|---------|---------|---------|
| C89  | 0.33281 | 0.23313 | 0.70302 | H224 | 0.33984 | 0.81519 | 0.30804 |
| C90  | 0.41542 | 0.18171 | 0.72944 | H225 | 0.2118  | 0.70381 | 0.25437 |
| C91  | 0.39667 | 0.20136 | 0.63226 | H226 | 0.21259 | 0.7711  | 0.22247 |
| C92  | 0.24756 | 0.45173 | 0.83967 | H227 | 0.26355 | 0.72023 | 0.20329 |
| C93  | 0.24288 | 0.56306 | 0.84709 | H228 | 0.33823 | 0.77334 | 0.21931 |
| C94  | 0.23325 | 0.54546 | 0.77096 | H229 | 0.21235 | 0.73261 | 0.34025 |
| H95  | 0.32936 | 0.24959 | 0.7454  | C230 | 0.53044 | 0.75739 | 0.37831 |
| H96  | 0.30943 | 0.19412 | 0.69984 | C231 | 0.55995 | 0.79138 | 0.46865 |
| H97  | 0.31584 | 0.26347 | 0.6735  | C232 | 0.47174 | 0.82137 | 0.42972 |
| H98  | 0.25407 | 0.41766 | 0.81008 | H233 | 0.49438 | 0.74448 | 0.35356 |
| H99  | 0.20291 | 0.4571  | 0.84721 | H234 | 0.55132 | 0.79235 | 0.3578  |
| H100 | 0.26854 | 0.44192 | 0.87895 | H235 | 0.55947 | 0.72243 | 0.38224 |
| H101 | 0.23393 | 0.46292 | 0.18661 | H236 | 0.58879 | 0.75625 | 0.47228 |
| H102 | 0.2648  | 0.41718 | 0.13664 | H237 | 0.58117 | 0.82664 | 0.44902 |
| H103 | 0.20359 | 0.45581 | 0.11898 | H238 | 0.54549 | 0.80342 | 0.51019 |
| H104 | 0.31153 | 0.45493 | 0.0561  | H239 | 0.49206 | 0.85689 | 0.4096  |
| H105 | 0.31584 | 0.52869 | 0.04659 | H240 | 0.43586 | 0.80821 | 0.40485 |
| H106 | 0.25049 | 0.49385 | 0.03864 | H241 | 0.45771 | 0.83343 | 0.4714  |
| H107 | 0.27249 | 0.211   | 0.36031 | H242 | 0.52304 | 0.14975 | 0.45466 |
| H108 | 0.21844 | 0.19214 | 0.31263 | H243 | 0.39971 | 0.79411 | 0.6061  |
| H109 | 0.21692 | 0.25853 | 0.34642 | H244 | 0.21271 | 0.82127 | 0.29957 |
| H110 | 0.45929 | 0.17429 | 0.71948 | C245 | 0.7158  | 0.62141 | 0.77944 |
| H111 | 0.39222 | 0.14259 | 0.72632 | C246 | 0.72004 | 0.3972  | 0.79861 |
| H112 | 0.41201 | 0.19832 | 0.77183 | C247 | 0.71639 | 0.50428 | 0.87013 |
| H113 | 0.44284 | 0.18446 | 0.59431 | C248 | 0.67505 | 0.39258 | 0.38357 |
| H114 | 0.57256 | 0.28412 | 0.40159 | C249 | 0.67393 | 0.61878 | 0.38074 |
| H115 | 0.58923 | 0.21188 | 0.40913 | C250 | 0.71196 | 0.51377 | 0.30988 |
| H116 | 0.58748 | 0.25622 | 0.46899 | H251 | 0.68544 | 0.63543 | 0.74852 |
| H117 | 0.35387 | 0.16021 | 0.23197 | H252 | 0.69481 | 0.61495 | 0.8194  |
| H118 | 0.27325 | 0.17043 | 0.24153 | H253 | 0.74822 | 0.65312 | 0.78422 |
| H119 | 0.34341 | 0.19528 | 0.30516 | H254 | 0.73987 | 0.5415  | 0.85812 |
| H120 | 0.21071 | 0.30399 | 0.25751 | H255 | 0.71016 | 0.50407 | 0.9153  |
| H121 | 0.21246 | 0.23798 | 0.22309 | H256 | 0.73959 | 0.46702 | 0.85775 |
| H122 | 0.26179 | 0.29077 | 0.20492 | H257 | 0.75151 | 0.36453 | 0.80329 |
| H123 | 0.43767 | 0.21467 | 0.38878 | H258 | 0.68161 | 0.37912 | 0.78199 |

---



|       |         |         |         |      |         |         |         |
|-------|---------|---------|---------|------|---------|---------|---------|
| H124  | 0.50194 | 0.18765 | 0.36242 | H259 | 0.71163 | 0.41623 | 0.8392  |
| H125  | 0.48625 | 0.26018 | 0.35547 | H260 | 0.63151 | 0.63456 | 0.38636 |
| H126  | 0.52223 | 0.19508 | 0.51379 | H261 | 0.67981 | 0.60576 | 0.33743 |
| H127  | 0.45845 | 0.17704 | 0.47988 | H262 | 0.70394 | 0.65152 | 0.39109 |
| H128  | 0.33867 | 0.2394  | 0.21791 | H263 | 0.72103 | 0.55396 | 0.32945 |
| H129  | 0.42673 | 0.22368 | 0.77364 | H264 | 0.72786 | 0.51363 | 0.26715 |
| H130  | 0.3793  | 0.23209 | 0.60338 | H265 | 0.73191 | 0.48041 | 0.33374 |
| H131  | 0.37363 | 0.16219 | 0.62853 | H266 | 0.68017 | 0.40422 | 0.33978 |
| Zr132 | 0.67635 | 0.50496 | 0.75143 | H267 | 0.6329  | 0.37649 | 0.39022 |
| O133  | 0.58632 | 0.50539 | 0.63219 | H268 | 0.70555 | 0.36049 | 0.39449 |
| O134  | 0.74024 | 0.43949 | 0.76054 | I269 | 0.39453 | 0.50521 | 0.30753 |
| O135  | 0.741   | 0.5696  | 0.76133 | I270 | 0.29915 | 0.50946 | 0.36393 |
